# Supplementary material for: Dynamics of environmental conditions during a decline of a Cymodocea nodosa meadow
Source: Copernicus journal article supplement (doi:10.5194/bg-2019-484), 2020-01-21
Supplement: Supplementary file 1 [file bg-2019-484-supplement.pdf]

Table S1. Concentrations of nutrients (orthophosphates – PO<sub>4</sub>, nitrates – NO<sub>3</sub>, nitrites – NO<sub>2</sub>, ammonia – NH<sub>4</sub> and silicates – SiO<sub>4</sub>), chlorophyll *a* (Chl *a*) and prokaryotic abundances (PA) in the water column of Saline Bay

| Sampling date  | PO <sub>4</sub><br>μM | NO <sub>3</sub><br>μM | NO <sub>2</sub><br>μM | NH <sub>4</sub><br>μM | SiO <sub>4</sub><br>μM | Chl <i>a</i><br>μgL <sup>-1</sup> | PA<br>·10 <sup>5</sup> cells mL <sup>-1</sup> |
|----------------|-----------------------|-----------------------|-----------------------|-----------------------|------------------------|-----------------------------------|-----------------------------------------------|
| July 2017      | 0.015                 | 1.132                 | 0.046                 | 0.480                 | 2.046                  | 0.30                              | 6.7                                           |
| August 2017    | 0.045                 | 1.374                 | 0.077                 | 1.195                 | 1.583                  | 0.31                              | 7.8                                           |
| September 2017 | 0.176                 | 6.242                 | 0.142                 | 1.885                 | 9.824                  | 0.89                              | 7.9                                           |
| October 2017   | 0.030                 | 0.743                 | 0.063                 | 0.505                 | 2.470                  | 0.63                              | 4.7                                           |
| November 2017  | 0.020                 | 1.120                 | 0.060                 | 0.820                 | 2.640                  | 0.61                              | 2.6                                           |
| December 2017  | 0.020                 | 0.570                 | 0.050                 | 0.460                 | 2.350                  | 0.40                              | 4.3                                           |
| February 2018  | 0.080                 | 2.150                 | 0.110                 | 1.140                 | 2.273                  | 0.31                              | 4.0                                           |
| March 2018     | 0.000                 | 1.667                 | 0.136                 | 0.542                 | 3.199                  | 0.30                              | 3.9                                           |
| April 2018     | 0.000                 | 1.004                 | 0.029                 | 0.616                 | 3.805                  | 0.55                              | 6.6                                           |
| May 2018       | 0.000                 | 0.855                 | 0.010                 | 0.314                 | 1.341                  | 0.47                              | 8.3                                           |
| June 2018      | 0.000                 | 1.650                 | 0.037                 | 0.702                 | 1.901                  | 0.31                              | 9.8                                           |
| July 2018      | 0.010                 | 1.162                 | 0.025                 | 1.152                 | 1.254                  | 0.43                              | 11.3                                          |
| August 2018    | 0.025                 | 0.652                 | 0.043                 | 0.906                 | 1.853                  | 0.39                              | 6.7                                           |
| September 2018 | 0.000                 | 0.487                 | 0.048                 | 0.487                 | 3.522                  | 0.39                              | 5.7                                           |
| October 2018   | 0.195                 | 0.855                 | 0.043                 | 0.721                 | 0.769                  | 0.55                              | 4.4                                           |

Table S2. Fatty acid markers assigned to organic sources and fatty acid pools: SAT – saturated fatty acids, PUFA – polyunsaturated fatty acids

| Fatty acids                                                         | Source                                                                 | Pool |
|---------------------------------------------------------------------|------------------------------------------------------------------------|------|
| C15:0i, ai; C15:0; C16:0i; C17:0i, ai;<br>C17:0Δ; C17:0; C18:1(n-7) | Bacteria / Detritus                                                    | SAT  |
| C20:5(n-3), C20:4(n-3)                                              | Phytoplankton / Seston<br>Macroalgae; Rhodophyta,<br>Ochrophyta        | PUFA |
| C18:3(n-3); C18:2(n-6)                                              | Macroalgae; Chlorophyta<br><i>C. nodosa</i>                            | PUFA |
| C ≥ 24 (C24:0, C26:0, C28:0)                                        | Vascular plants; terrestrial / seston<br>Detritus ( <i>C. nodosa</i> ) | SAT  |
| C16:0, C18:0                                                        | Common to all sources                                                  | SAT  |

Table S3. F-ratios, ranges (min and max), means and standard deviations (sd) of fatty acids proportions and ratios for groups of *C. nodosa* leaves obtained by K-means procedure. SAT – saturated fatty acids, MUFA – monounsaturated fatty acids, PUFA – polyunsaturated fatty acids, UND – unsaturation degree, BACT – bacterial fatty acids.

| Fatty acid | F- ratio | Group 1 |       |       |      | Group 2 |       |       |      | Group 3 |       |       |      | August 2018 |
|------------|----------|---------|-------|-------|------|---------|-------|-------|------|---------|-------|-------|------|-------------|
|            |          | min     | mean  | max   | sd   | min     | mean  | max   | sd   | min     | mean  | max   | sd   |             |
| C14:0      | 8,431    | 0,68    | 0,93  | 1,25  | 0,21 | 0,62    | 0,90  | 1,17  | 0,23 | 0,85    | 1,57  | 2,92  | 1,02 | 2,92        |
| C16:1(n-7) | 0,507    | 1,14    | 2,15  | 4,79  | 1,47 | 0,68    | 1,36  | 2,08  | 0,61 | 0,47    | 2,29  | 4,10  | 2,57 | 3,10        |
| C16:0      | 6,014    | 15,11   | 19,87 | 25,18 | 3,53 | 19,87   | 21,07 | 22,94 | 1,44 | 26,51   | 27,99 | 29,46 | 2,09 | 28,63       |
| C18:2(n-6) | 9,921    | 21,27   | 23,36 | 27,00 | 2,79 | 21,75   | 27,11 | 32,92 | 5,22 | 16,20   | 17,56 | 18,92 | 1,92 | 5,96        |
| C18:3(n-3) | 33,576   | 24,75   | 31,41 | 34,96 | 3,72 | 21,67   | 24,34 | 26,28 | 1,95 | 8,67    | 12,22 | 15,77 | 5,02 | 0,00        |
| C18:1(n-9) | 1,214    | 3,93    | 4,94  | 5,43  | 0,60 | 3,56    | 6,11  | 8,04  | 2,22 | 4,65    | 6,21  | 7,76  | 2,20 | 7,52        |
| C18:0      | 5,571    | 2,13    | 2,56  | 3,29  | 0,43 | 2,33    | 2,83  | 3,61  | 0,61 | 2,33    | 2,95  | 3,56  | 0,87 | 5,02        |
| C20:0      | 0,713    | 0,43    | 0,70  | 1,26  | 0,31 | 0,54    | 0,70  | 0,86  | 0,18 | 0,41    | 0,42  | 0,42  | 0,01 | 0,69        |
| C22:0      | 0,570    | 1,54    | 2,43  | 4,40  | 1,09 | 2,47    | 2,90  | 3,40  | 0,43 | 1,69    | 2,02  | 2,34  | 0,46 | 2,88        |
| ≥ C24      | 147,894  | 0,79    | 2,22  | 3,15  | 0,83 | 3,07    | 3,92  | 4,80  | 0,89 | 13,26   | 14,82 | 16,37 | 2,20 | 22,35       |
| SAT        | 103,457  | 29,14   | 31,79 | 33,99 | 2,02 | 33,02   | 36,01 | 40,11 | 3,43 | 53,89   | 57,24 | 60,59 | 4,74 | 78,26       |
| MUFA       | 2,717    | 8,65    | 9,83  | 11,75 | 1,30 | 9,76    | 10,46 | 10,96 | 0,50 | 10,57   | 11,87 | 13,16 | 1,83 | 12,74       |
| PUFA       | 123,611  | 55,11   | 58,08 | 59,47 | 1,71 | 49,22   | 53,23 | 56,70 | 3,36 | 26,17   | 30,43 | 34,68 | 6,02 | 5,96        |
| UND        | 89,096   | 4,85    | 5,16  | 5,37  | 0,23 | 3,49    | 4,14  | 4,58  | 0,51 | 1,42    | 1,61  | 1,79  | 0,26 | 0,34        |
| BACT       | 2,362    | 1,76    | 3,16  | 5,15  | 1,20 | 1,72    | 3,07  | 4,63  | 1,19 | 2,96    | 4,81  | 6,66  | 2,62 | 13,14       |

Group 1: July-October 2017, February-March 2018

Group 2: November-December 2017, April-May 2018

Group 3: June-July 2018

Table S4. F-ratios, ranges (min and max), means and standard deviations (sd) of fatty acids proportions and ratios for groups of *C. nodosa* rhizomes and roots obtained by K-means procedure. SAT – saturated fatty acids, MUFA – monounsaturated fatty acids, PUFA – polyunsaturated fatty acids, UND – unsaturation degree, BACT – bacterial fatty acids.

| Fatty acid | F-ratio | Group 1 |       |       |      | Group 2 |       |       |      | Group 3 |       |       |      |
|------------|---------|---------|-------|-------|------|---------|-------|-------|------|---------|-------|-------|------|
|            |         | min     | mean  | max   | sd   | min     | mean  | max   | sd   | min     | mean  | max   | sd   |
| C14:0      | 2,243   | 0,50    | 1,09  | 1,71  | 0,51 | 1,12    | 1,35  | 1,74  | 0,27 | 1,77    | 1,99  | 2,38  | 0,24 |
| C16:1(n-7) | 1,894   | 1,12    | 2,12  | 4,24  | 1,12 | 1,40    | 2,21  | 2,52  | 0,54 | 1,79    | 4,11  | 8,86  | 2,82 |
| C16:0      | 2,517   | 17,72   | 23,11 | 30,15 | 5,05 | 18,35   | 22,82 | 25,60 | 3,39 | 18,96   | 24,69 | 27,42 | 3,33 |
| C18:2(n-6) | 36,160  | 21,06   | 27,91 | 33,29 | 4,62 | 21,28   | 23,26 | 26,28 | 2,22 | 13,34   | 15,53 | 17,30 | 1,75 |
| C18:3(n-3) | 3,504   | 3,12    | 4,60  | 8,95  | 2,96 | 4,02    | 4,53  | 5,59  | 0,72 | 3,17    | 4,26  | 5,15  | 0,74 |
| C18:1(n-9) | 11,067  | 12,15   | 13,39 | 14,65 | 1,09 | 11,73   | 12,55 | 12,91 | 0,56 | 6,41    | 7,48  | 8,89  | 0,92 |
| C18:0      | 2,640   | 3,42    | 4,76  | 7,15  | 1,40 | 4,10    | 4,65  | 5,27  | 0,50 | 3,40    | 4,28  | 5,49  | 0,96 |
| C20:0      | 0,618   | 0,85    | 0,99  | 1,59  | 0,32 | 0,62    | 0,82  | 1,02  | 0,23 | 0,42    | 0,70  | 1,04  | 0,27 |
| C22:0      | 0,328   | 1,37    | 2,55  | 6,00  | 1,73 | 1,71    | 2,10  | 2,49  | 0,44 | 1,26    | 2,40  | 4,65  | 1,41 |
| ≥C24       | 9,814   | 4,75    | 7,35  | 13,08 | 3,08 | 9,90    | 13,61 | 20,45 | 4,78 | 9,20    | 22,54 | 34,46 | 9,15 |
| SAT        | 59,790  | 36,90   | 45,14 | 56,75 | 7,46 | 49,44   | 51,49 | 54,00 | 2,36 | 59,83   | 65,20 | 67,96 | 3,44 |
| MUFA       | 4,420   | 17,19   | 20,78 | 28,56 | 4,23 | 17,10   | 18,59 | 20,78 | 1,58 | 11,35   | 13,68 | 18,50 | 2,82 |
| PUFA       | 39,164  | 24,15   | 33,92 | 43,66 | 7,36 | 27,33   | 29,59 | 33,46 | 2,76 | 19,85   | 21,12 | 22,62 | 1,11 |
| UND        | 18,765  | 1,21    | 2,06  | 2,77  | 0,61 | 1,38    | 1,55  | 1,76  | 0,20 | 0,78    | 0,90  | 1,17  | 0,16 |
| BACT       | 1,625   | 5,10    | 6,24  | 8,35  | 1,17 | 5,49    | 7,34  | 8,71  | 1,34 | 6,72    | 9,09  | 10,91 | 2,45 |

Group 1: July - October 2017, February - March 2018

Group 2: November-December 2017, April -May 2018

Group 3: June -October 2018

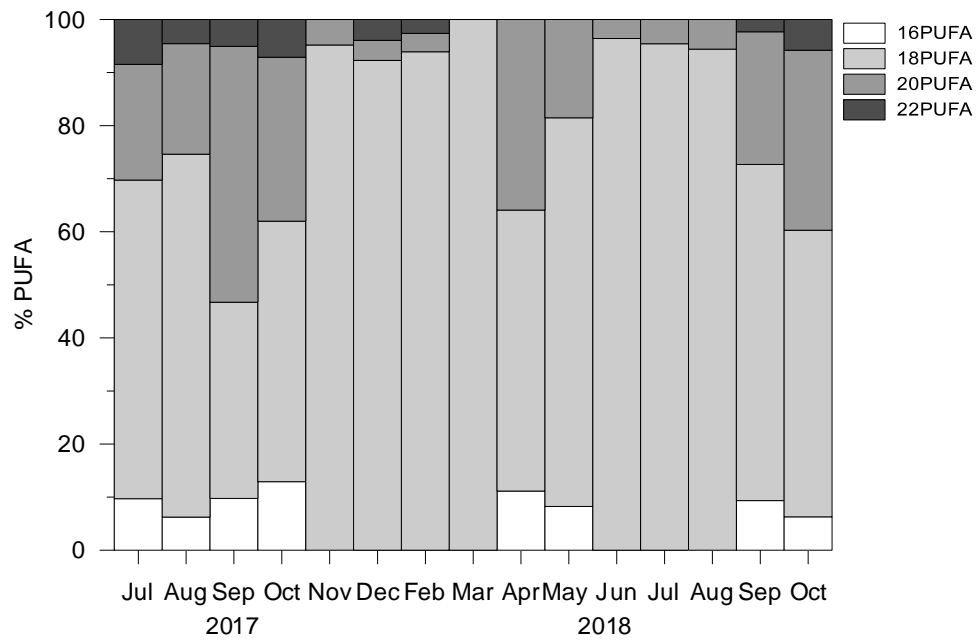

1

2 Figure S1. Contributions of PUFA with 16, 18, 20 and 22C atoms to PUFA pool of particulate  
 3 matter in seawater

4

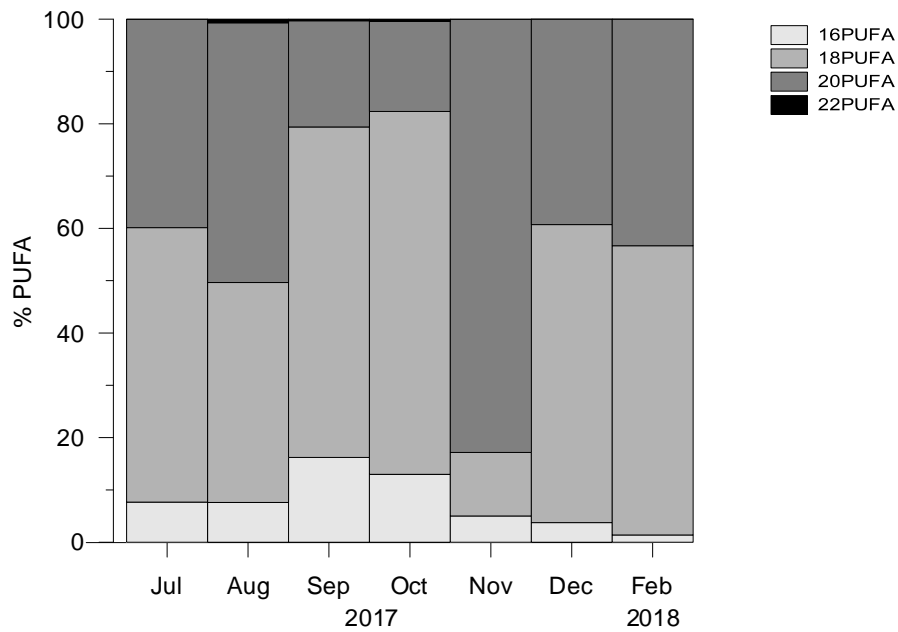

5

6 Figure S2. Contributions of PUFA with 16, 18, 20 and 22C atoms to PUFA pool of epiphytic  
 7 macroalgae mix during their notable presence in a *C. nodosa* meadow

8

9

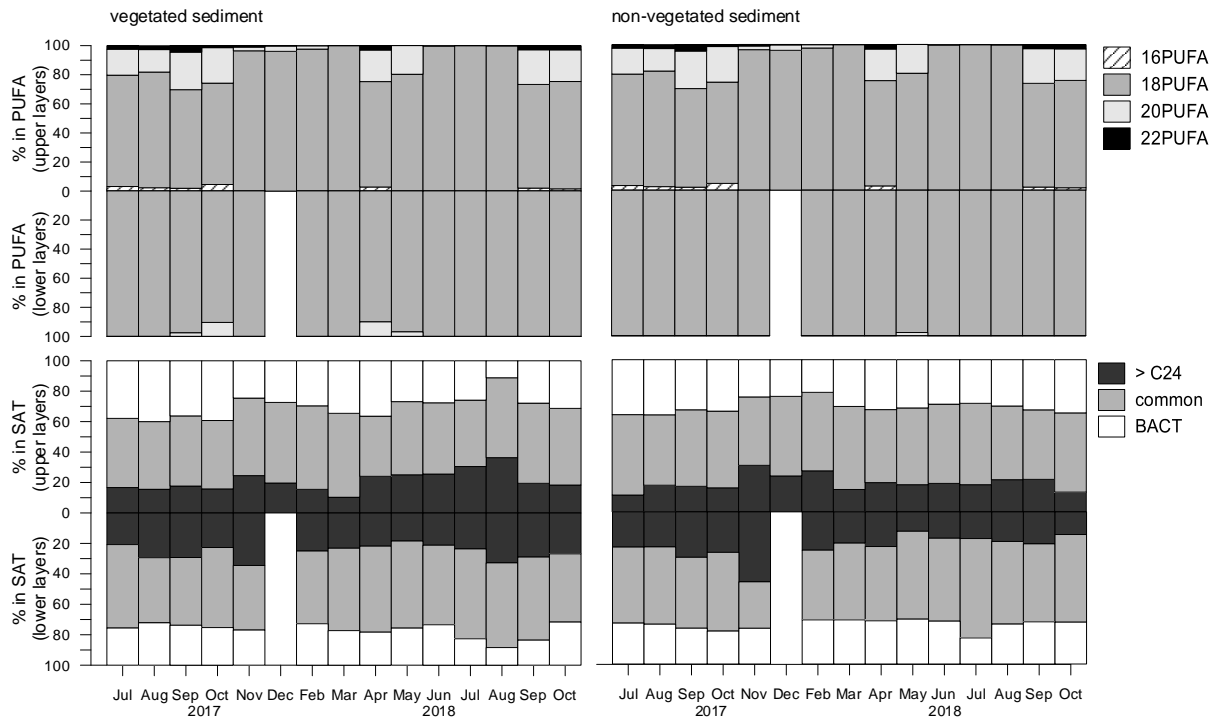

10

11

12 Figure S3. Contributions of PUFA with 16, 18, 20 and 22C atoms to PUFA pool and  
 13 contributions of bacterial (BACT), common and long chain fatty acids ( $C \geq 24$ ) to SAT pool  
 14 in the upper (0 - 4 cm) and lower (5 - 8 cm) layers of vegetated and non-vegetated sediments.
